# Supplementary material for: Preparation of Chitin Nanofibers and Natural Rubber Composites and Their Triboelectric Nanogenerator Applications
Source: MDPI journal article supplement (doi:10.3390/ma17030738), 2024-02-03
Supplement: s1 [file s1]

# Preparation of chitin nanofibers and natural rubber composites and their triboelectric nanogenerator applications

Kattaliya Petchnui <sup>1</sup>, Teerayut Uwanno <sup>1</sup>, Mayuree Phonyiem Reilly <sup>1</sup>, Chinathun Pinming <sup>1</sup>, Alongkot Treetong <sup>2</sup>, Visittapong Yordsri <sup>3</sup>, Nutthanun Moolsradoo <sup>4</sup>, Annop Klamcheun <sup>2</sup> and Winadda Wongwiriyan <sup>1,\*</sup>

---

<sup>1</sup> College of Materials Innovation and Technology, King Mongkut's Institute of Technology Ladkrabang, Chalongkrung Rd., Ladkrabang, Bangkok 10520, Thailand; kattaliya.pang@gmail.com (K.P.); teerayut.uw@kmitl.ac.th (T.U.); mayuree.ph@kmitl.ac.th (M.P.R.); chinathun.aron@gmail.com (C.P.)

<sup>2</sup> National Nanotechnology Center (NANOTEC), National Science and Technology Development Agency (NSTDA), 111 Thailand Science Park, Paholyothin Rd., Klong Nueng, Klong Luang, Pathum Thani 12120, Thailand; alongkot@nanotec.or.th (A.T.); annop@nanotec.or.th (A.K.)

<sup>3</sup> National Metal and Materials Technology Center (MTEC), National Science and Technology Development Agency (NSTDA), 111 Thailand Science Park, Paholyothin Rd., Klong Nueng, Klong Luang, Pathum Thani 12120, Thailand; visittay@mtect.or.th

<sup>4</sup> Department of Production Technology Education, Faculty of Industrial Education and Technology, King Mongkut's University of Technology Thonburi, 126 Pracha Uthit Rd., Thung Khru, Bangkok 10140, Thailand; nutthanun.moo@kmutt.ac.th

\* Correspondence: winadda.wo@kmitl.ac.th

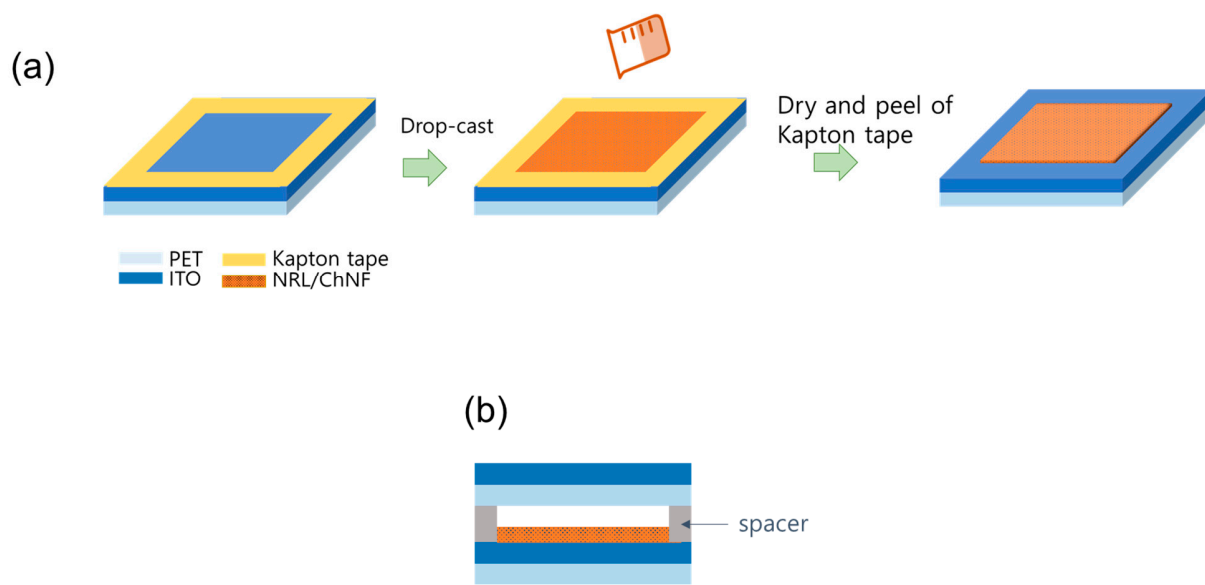

Figure S1. Schematic views of (a) the NRL/ChNF triboelectric layer preparation process (b) TENG device.

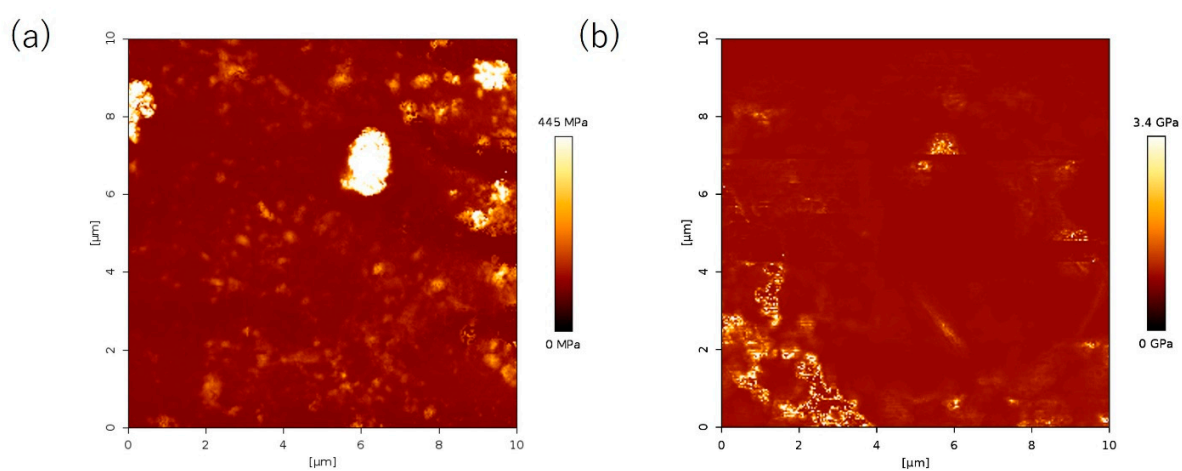

Figure S2. AFM images of Young's modulus mapping of (a) NRL and (b) ChNF0.2
